# Supplementary material
Source: PubMed Central journal article supplement (PMC6291713)
Supplement: ajtr0010-3413-f9.pdf [file ajtr0010-3413-f9.pdf]

## Myoprotective role of JAK2 in I/R injury

**Supplementary Table 1.** Clinical characteristics of patients with deep PU

| Gender | Age | BMI#<br>(Kg/m <sup>2</sup> ) | Etiology/Past Disease         | Multi-<br>morbidity | Ulceration<br>Duration | Ulceration<br>Position | Ulceration<br>Size (cm <sup>2</sup> ) | Wound<br>Infection | Hemoglo-<br>bin (g/L) |
|--------|-----|------------------------------|-------------------------------|---------------------|------------------------|------------------------|---------------------------------------|--------------------|-----------------------|
| M      | 18  | 19.3                         | Paraplegia                    | No                  | 5 m                    | Sacrococcygeal         | 10 × 18                               | Yes                | 83                    |
| M      | 29  | 20.8                         | Traumatic Brain Injury        | No                  | 3 m                    | Sacrococcygeal         | 6 × 8                                 | Yes                | 93                    |
| M      | 68  | 27.5                         | Postoperative Wound Infection | Yes                 | 1 m                    | Sacrococcygeal         | 12 × 10                               | Yes                | 109                   |
| F      | 19  | 21.3                         | Multiple Trauma               | Yes                 | 1 m                    | Sacrococcygeal         | 6 × 7                                 | Yes                | 97                    |
| F      | 29  | 23.7                         | Syringomyelia                 | No                  | 12 m                   | Ischial tuberosity     | 5 × 5                                 | Yes                | 90                    |
| M      | 74  | 27.5                         | Paraplegia                    | No                  | 3 m                    | Sacrococcygeal         | 11 × 10                               | Yes                | 98                    |
| M      | 43  | 23.3                         | Paraplegia                    | No                  | 6 m                    | Ischial tuberosity     | 11 × 10                               | Yes                | 134                   |
| M      | 26  | 39.2                         | Severe Acute Pancreatitis     | Yes                 | 3 m                    | Sacrococcygeal         | 7 × 8                                 | Yes                | 97                    |
| F      | 39  | 22.1                         | Paraplegia                    | No                  | 3 m                    | Sacrococcygeal         | 8 × 8                                 | Yes                | 101                   |
| M      | 40  | 25.6                         | Paraplegia                    | No                  | 8 m                    | Greater trochanter     | 10 × 8                                | Yes                | 145                   |
| M      | 32  | 22.3                         | Paraplegia                    | Yes                 | 10 m                   | Ischial tuberosity     | 6 × 5                                 | Yes                | 68                    |

#: Body Mass Index.

**Supplementary Table 2.** Primary antibodies used in this study

| Cat. No.   | Antibody                | Source | Manufacturer | Town & State | Country | Dilution |
|------------|-------------------------|--------|--------------|--------------|---------|----------|
| 3230       | JAK2                    | Rabbit | CST          | Beverly, MA  | USA     | 1:1000   |
| 4406       | p-JAK2 (Tyr1007)        | Rabbit | CST          | Beverly, MA  | USA     | 1:1000   |
| 4904       | STAT3                   | Rabbit | CST          | Beverly, MA  | USA     | 1:2000   |
| 9145       | p-STAT3 (Tyr705)        | Rabbit | CST          | Beverly, MA  | USA     | 1:2000   |
| 4691       | AKT (pan)               | Rabbit | CST          | Beverly, MA  | USA     | 1:1000   |
| 4060       | p-AKT (Ser473)          | Rabbit | CST          | Beverly, MA  | USA     | 1:2000   |
| 4695       | ERK1/2                  | Rabbit | CST          | Beverly, MA  | USA     | 1:1000   |
| 4370       | p-ERK1/2(Thr202/Tyr204) | Rabbit | CST          | Beverly, MA  | USA     | 1:2000   |
| 2983       | mTOR                    | Rabbit | CST          | Beverly, MA  | USA     | 1:1000   |
| 5536       | p-mTOR (Ser2448)        | Rabbit | CST          | Beverly, MA  | USA     | 1:1000   |
| 2895       | CHOP                    | Mouse  | CST          | Beverly, MA  | USA     | 1:1000   |
| 9662       | Caspase-3               | Rabbit | CST          | Beverly, MA  | USA     | 1:1000   |
| 2870       | Bcl-2                   | Rabbit | CST          | Beverly, MA  | USA     | 1:1000   |
| 50599-2-Ig | Bax                     | Rabbit | ProteinTech  | Chicago, IL  | USA     | 1:2000   |
| 9661       | Cleaved Caspase-3       | Rabbit | CST          | Beverly, MA  | USA     | 1:1000   |
| 3495       | Beclin-1                | Rabbit | CST          | Beverly, MA  | USA     | 1:1000   |
| 5114       | SQSTM1/P62              | Rabbit | CST          | Beverly, MA  | USA     | 1:1000   |
| 12994      | ATG5                    | Rabbit | CST          | Beverly, MA  | USA     | 1:1000   |
| 2775       | LC3B                    | Rabbit | CST          | Beverly, MA  | USA     | 1:1000   |
| 4970       | β-Actin                 | Rabbit | CST          | Beverly, MA  | USA     | 1:1000   |

## Myoprotective role of JAK2 in I/R injury

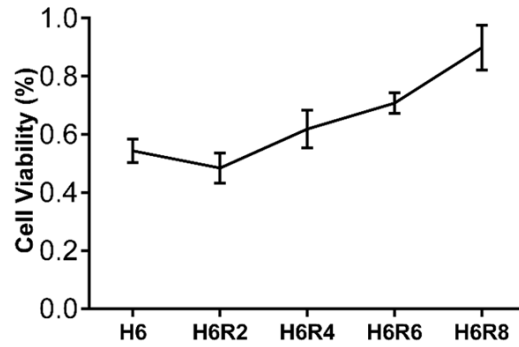

**Supplementary Figure 1.** Cell viability assay of C2C12 myoblasts exposed to OGD with different time periods of reoxygenation.

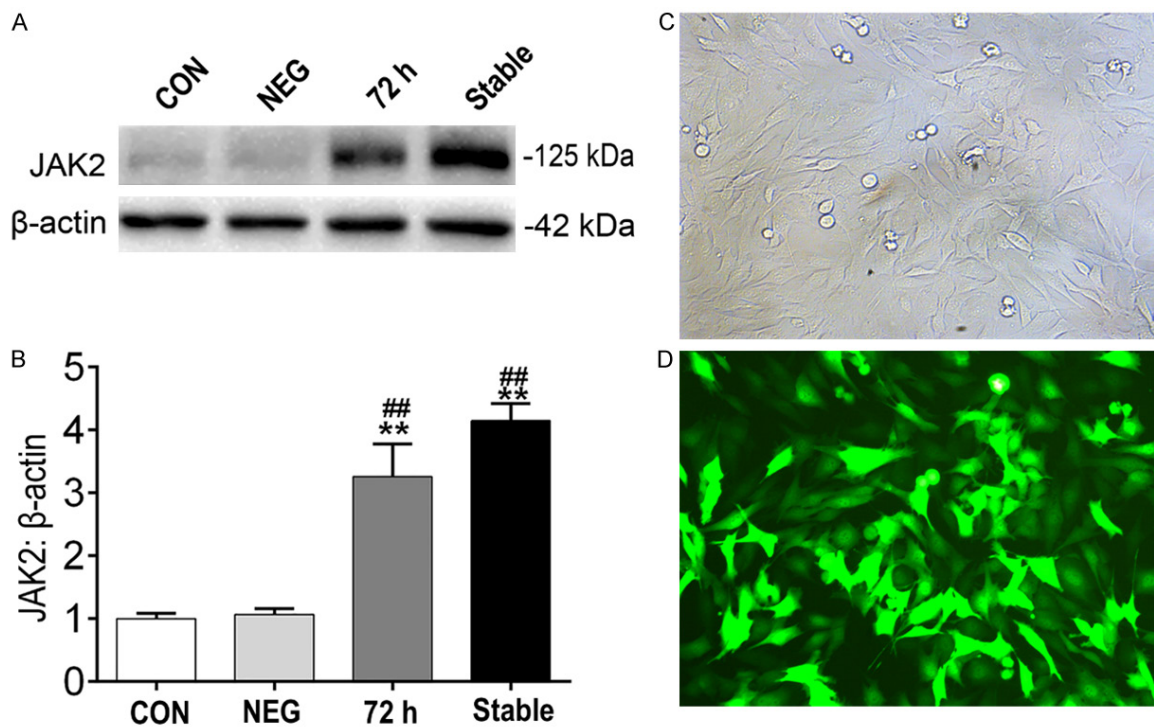

**Supplementary Figure 2.** Validation of JAK2 overexpression in C2C12 myoblast cells. A. Immunoblot images of JAK2 and  $\beta$ -actin in C2C12 myoblasts, which were transfected with lentivirus carrying a negative control (NEG) plasmid and JAK2 plasmid after 72 h (72 h) or selection with puromycin (Stable). B. Relative quantification of JAK2 after normalization by  $\beta$ -actin, the data were derived from three independent experiments (Means  $\pm$  SD; \*\* $P < 0.01$  versus Control; <sup>##</sup> $P < 0.01$  versus NEG). C. Light microscope photographs of C2C12 myoblast cells. D. Fluorescent photographs of EGFP expression in JAK2-overexpressed C2C12 myoblast cells.
